# Supplementary material for: Estetrol Combined to Progestogen for Menopause or Contraception Indication Is Neutral on Breast Cancer
Source: MDPI journal article supplement (doi:10.3390/cancers13102486), 2021-05-20
Supplement: s1 [file s1]

Figure 4 Panel C\_visible pour PR

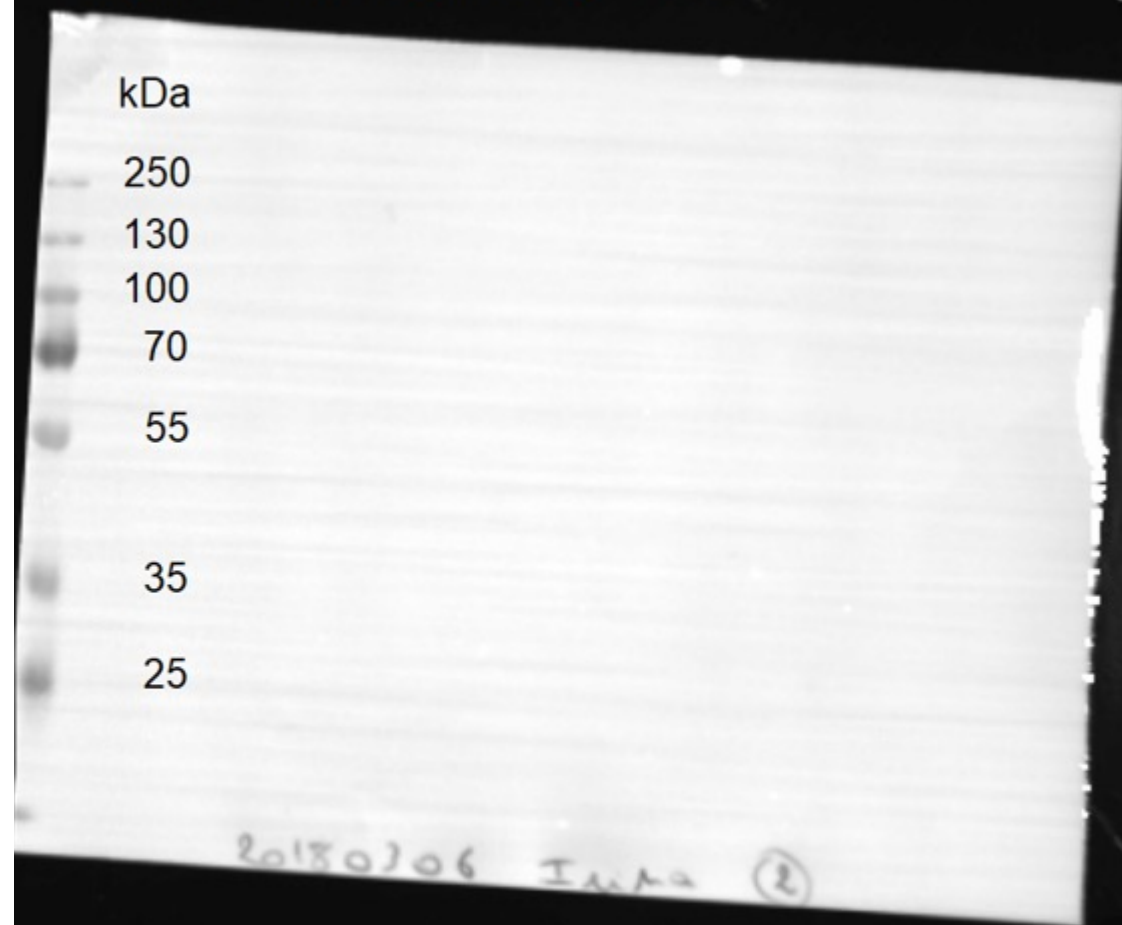

E2  $10^{-9}$ M  
E4  $10^{-7}$ M

FIGURE 4 Panel C\_PR

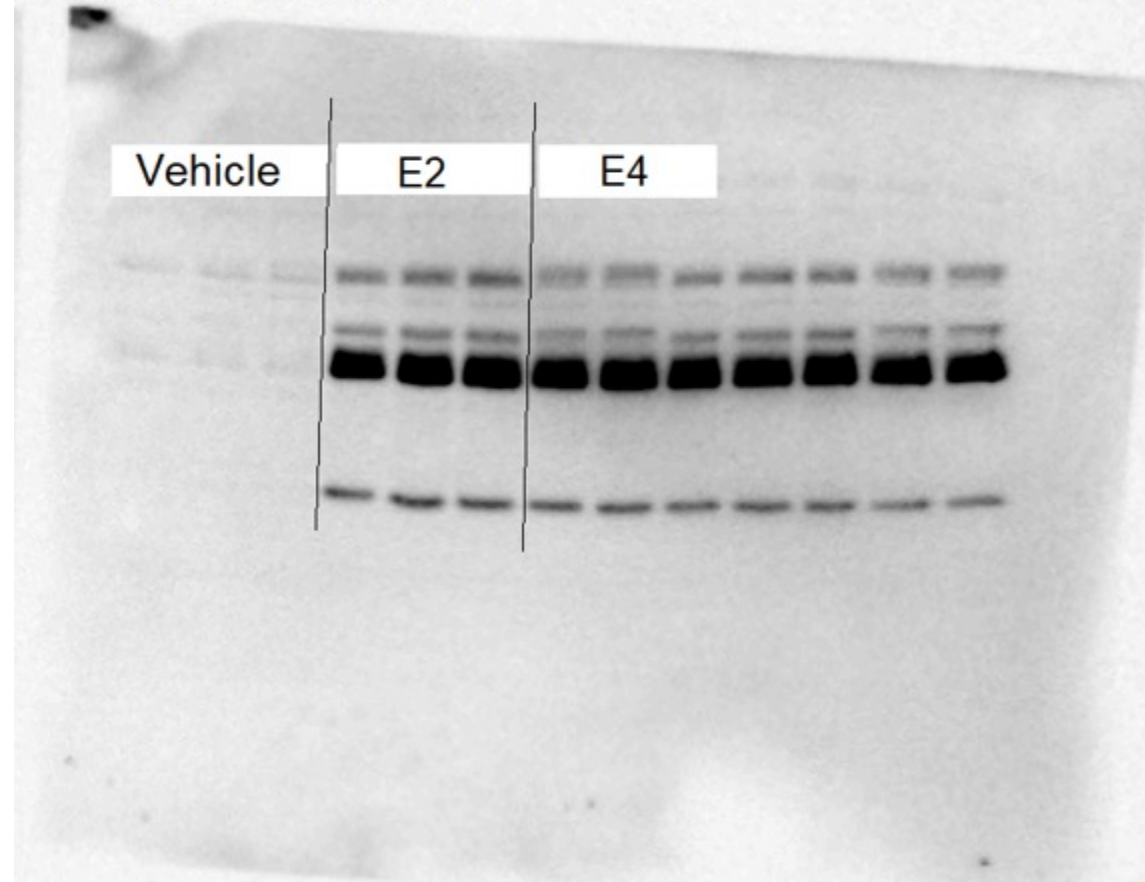

Figure 4 Panel C\_visible pour PR\_Fichier bis

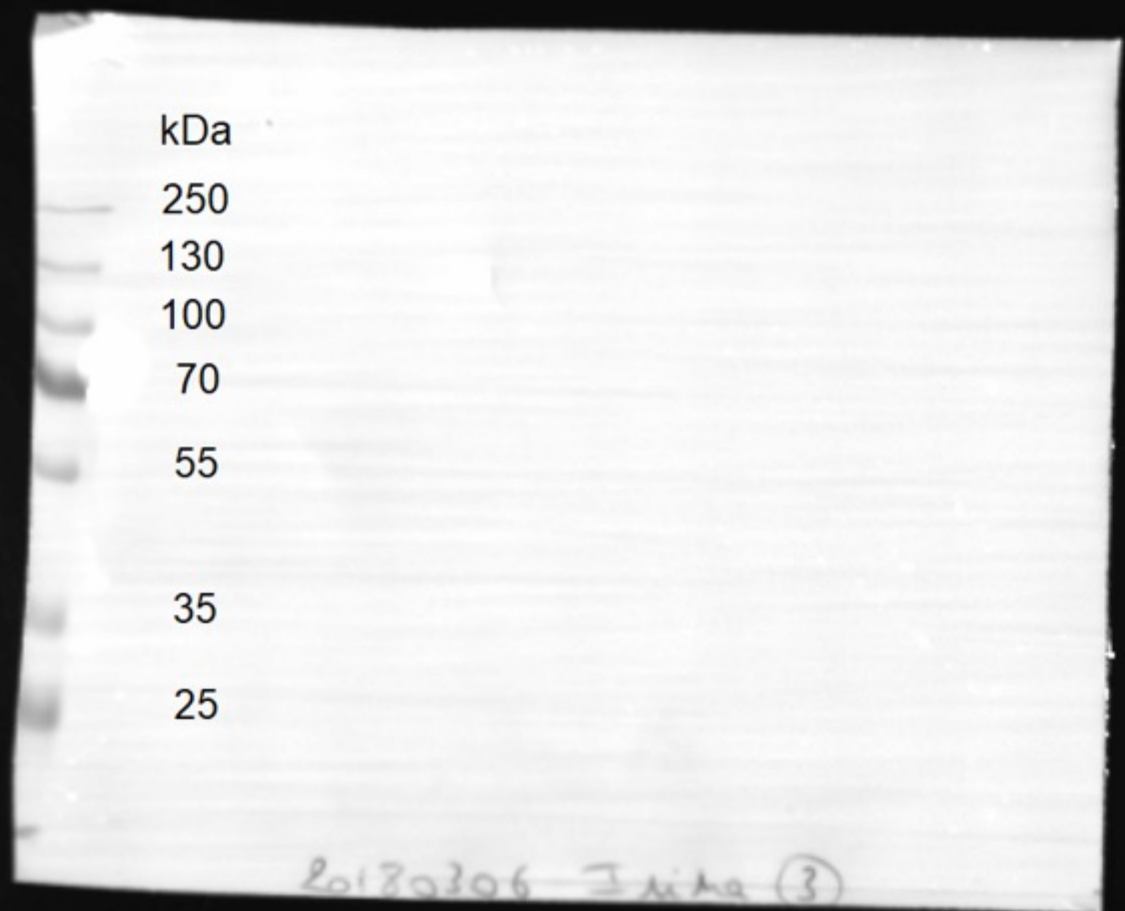

E2  $10^{-9}$ M  
E4  $10^{-10}$ M

Figure 4 Panel C\_PR\_Fichier bis

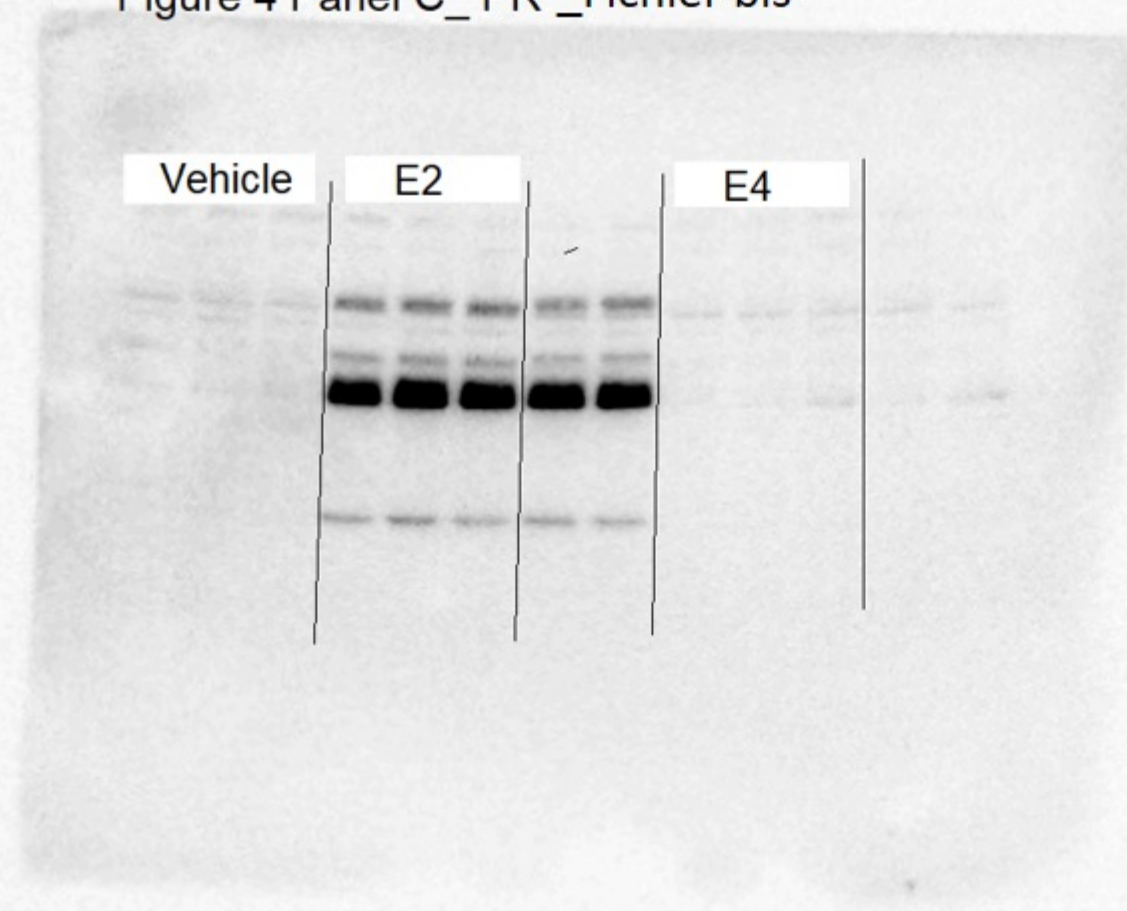

Figure 4 Panel C\_visible pour ERalpha

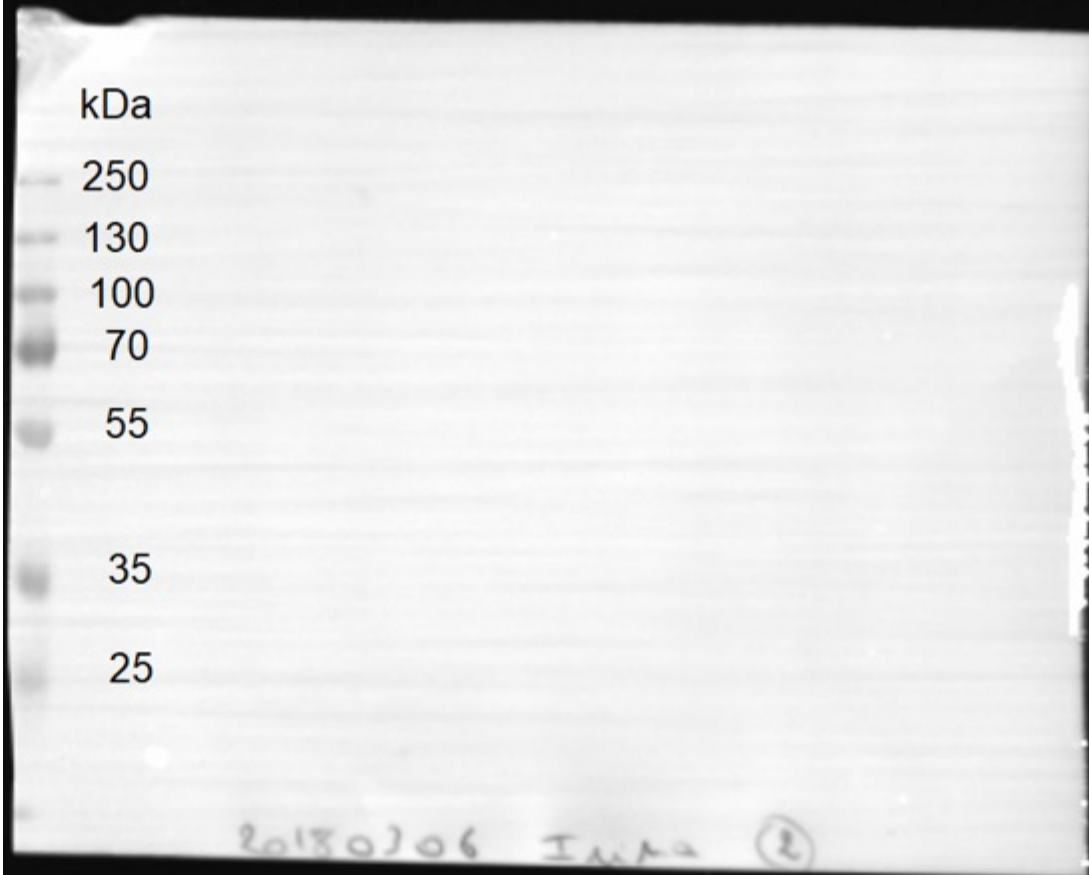

E2  $10^{-9}$ M  
E4  $10^{-7}$ M

Figure 4 Panel C \_ERalpha

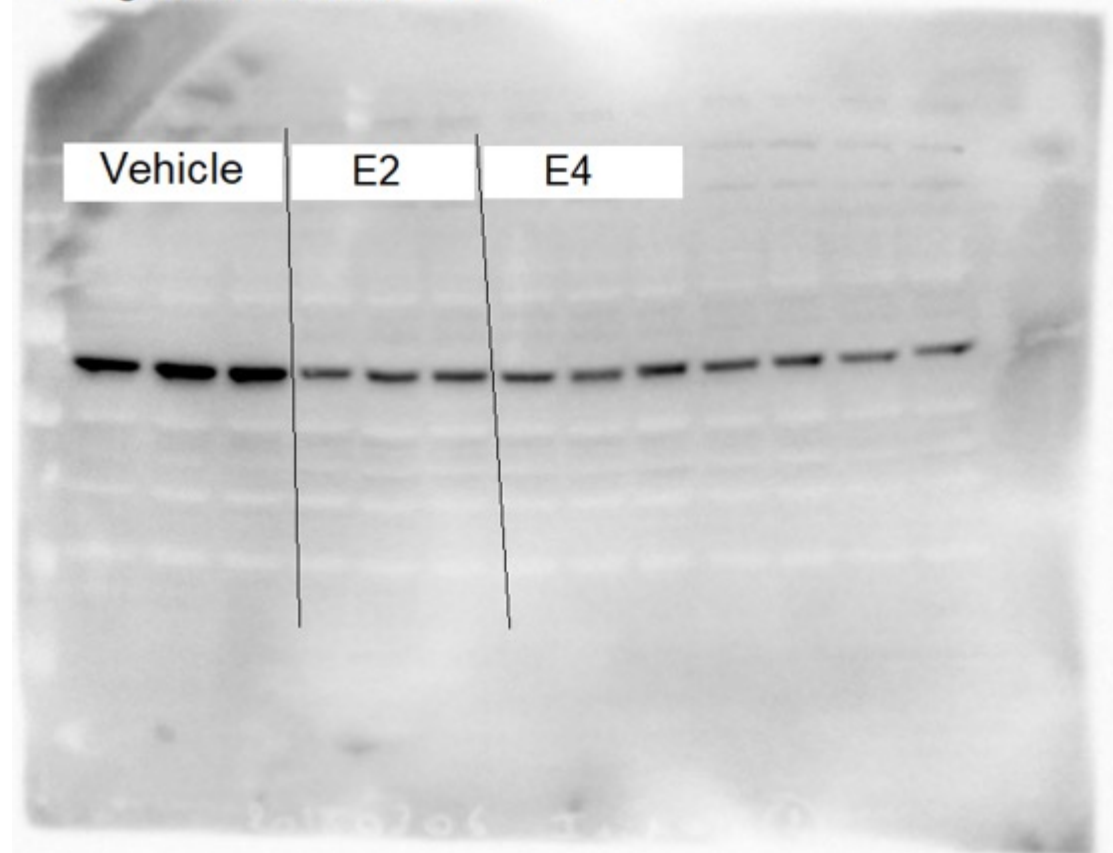

Figure 4 Panel C\_visible pour Eralpha\_fichier bis

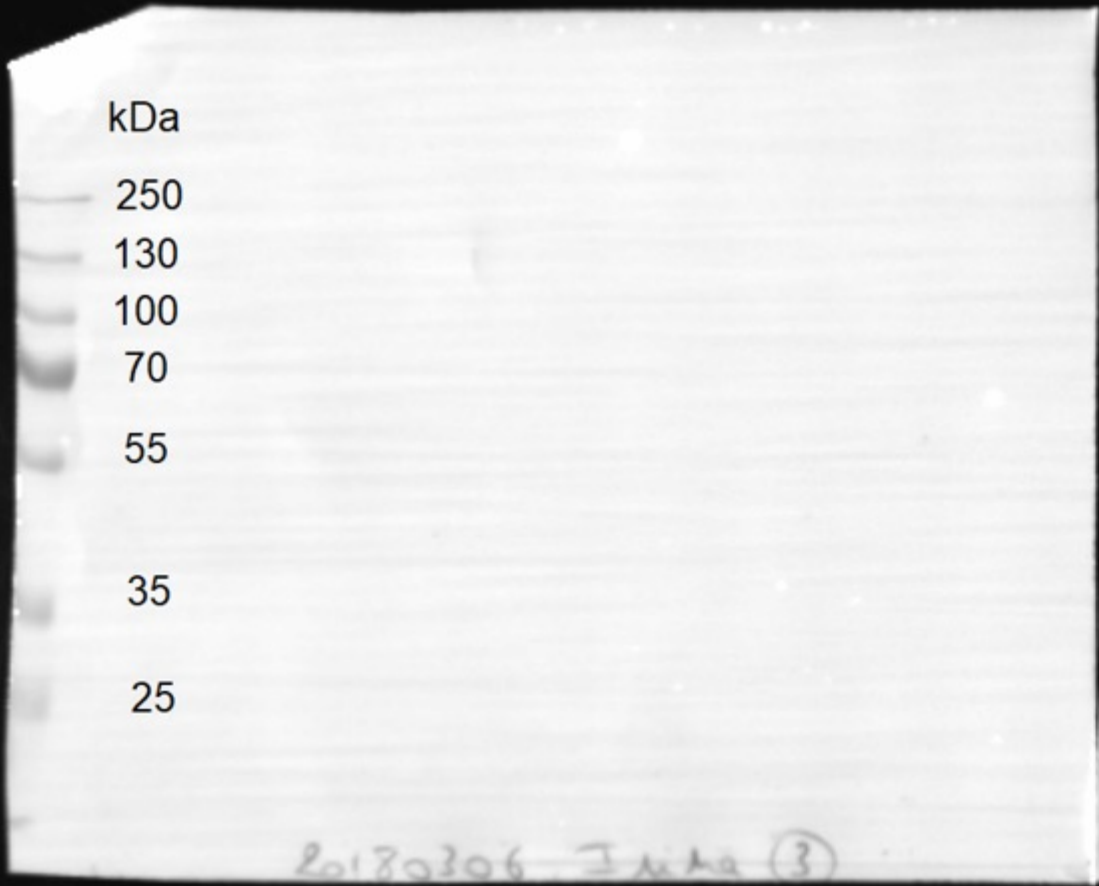

E2 10<sup>-9</sup>M  
E4 10<sup>-10</sup>M

Figure 4 Panel C bis\_ER \_Fichier Bis

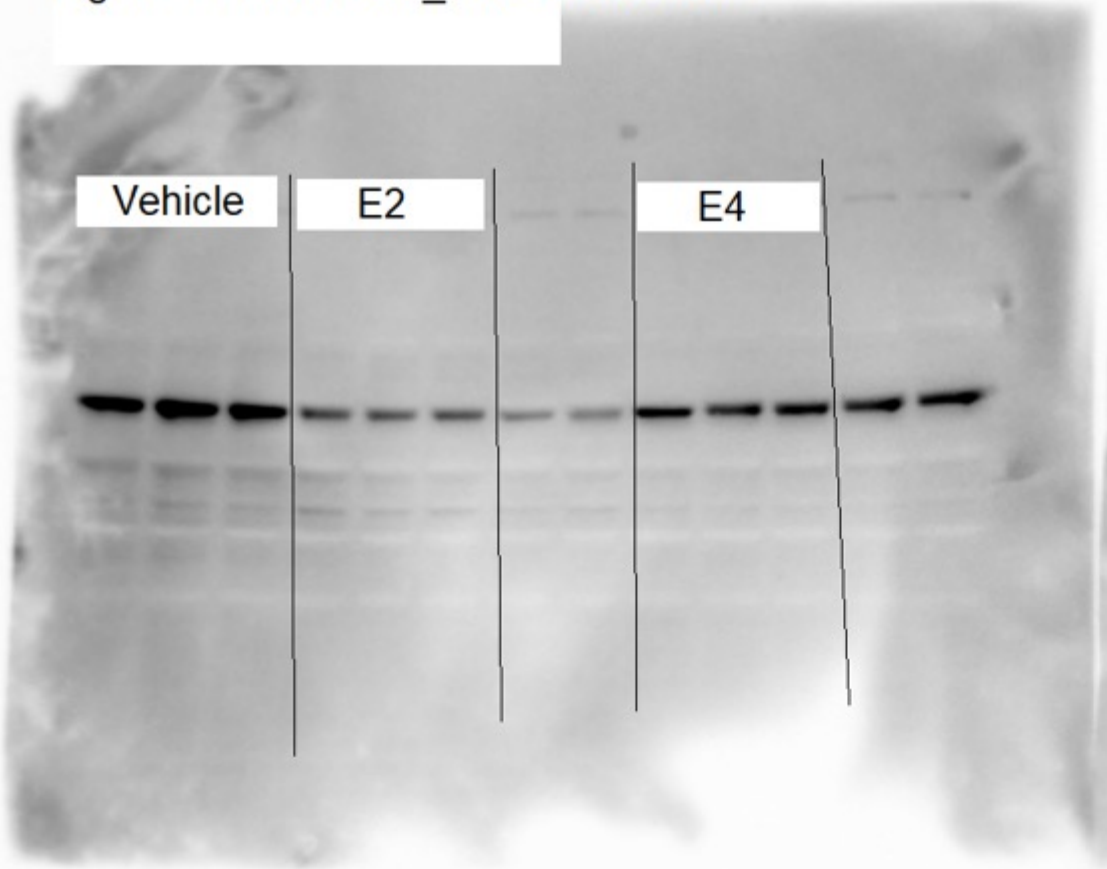

Figure 4 Panel C\_visible for ERalpha and GAPDH

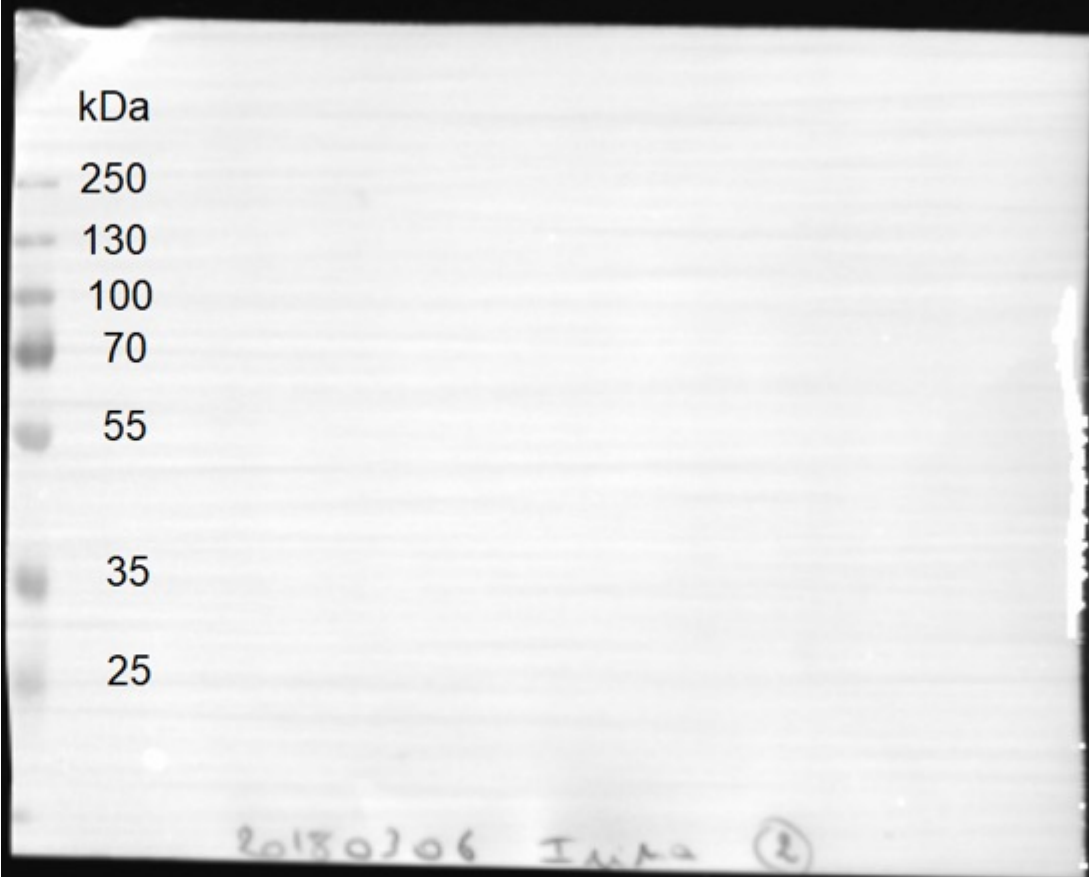

E2  $10^{-9}$ M  
E4  $10^{-7}$ M

Figure 4 Panel C\_GAPDH

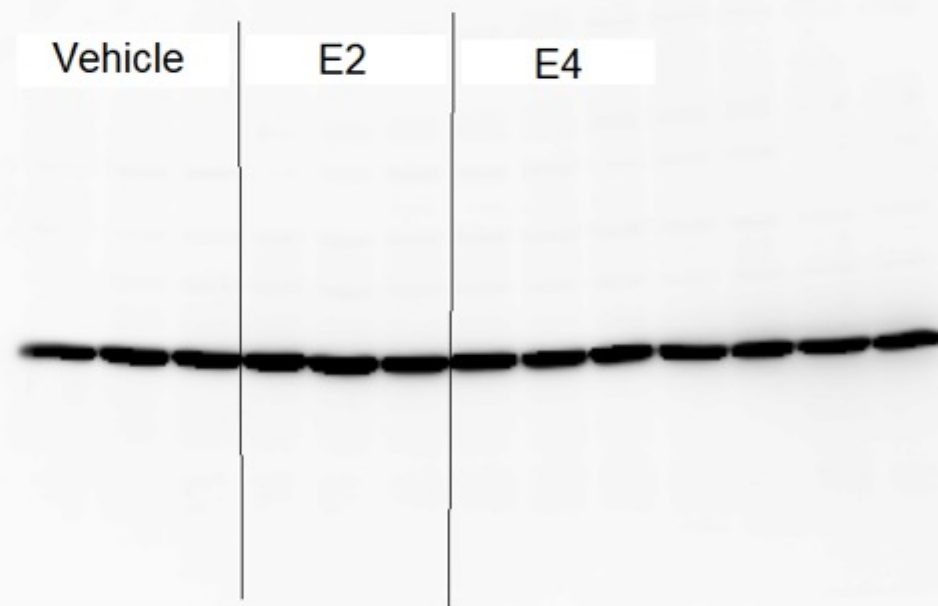



Figure 4 Panel C\_visible for ERalpha and GAPDH\_fichier bis

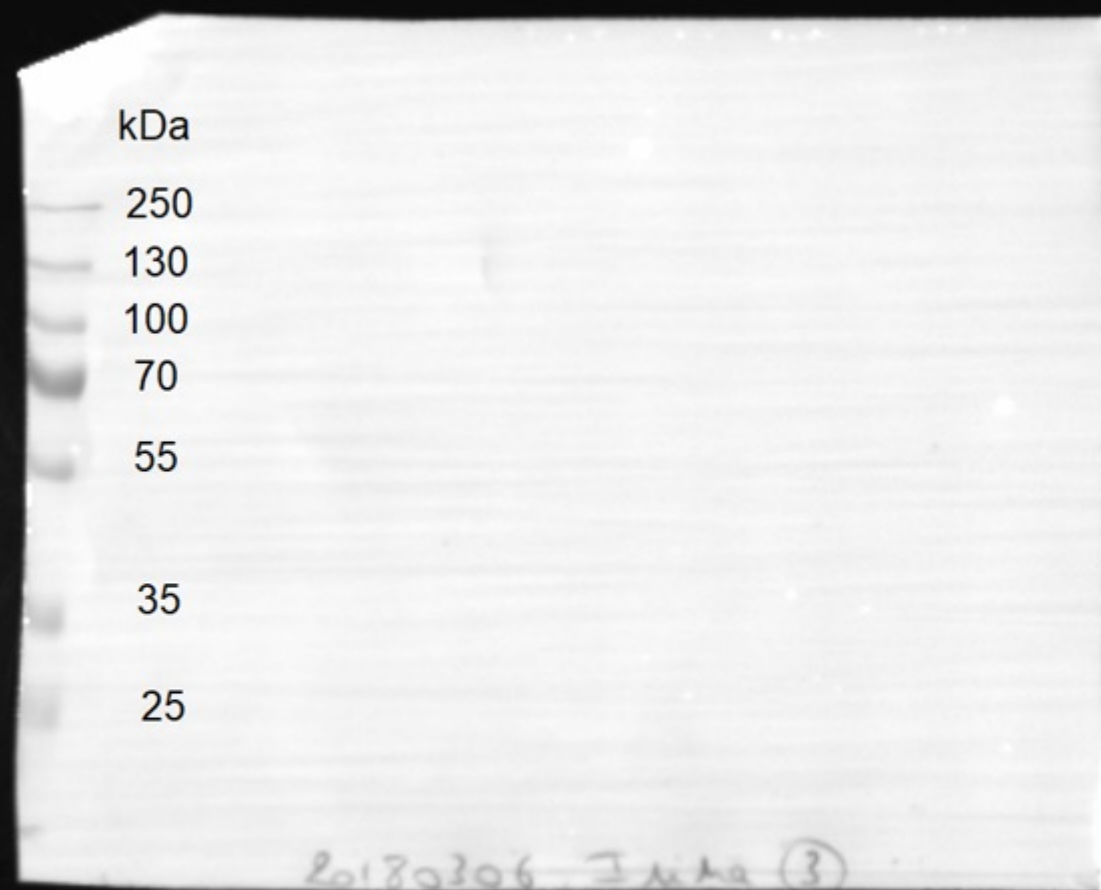

E2  $10^{-9}$ M  
E4  $10^{-10}$ M

Figure 4 Panel C\_GAPDH Picture bis

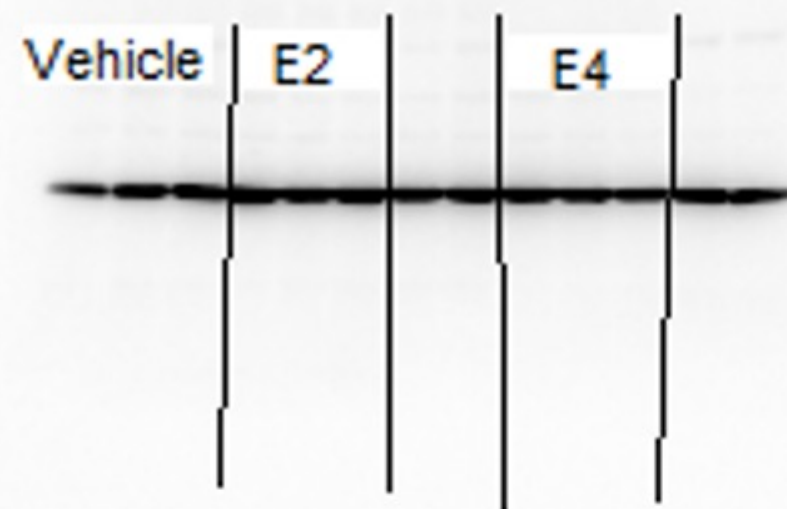

| MCF7 Cells Western blot quantification          |                       |                        |                       |
|-------------------------------------------------|-----------------------|------------------------|-----------------------|
| Figure 4 Panel C                                |                       |                        |                       |
| PR/GAPDH Quantification                         |                       |                        |                       |
| Vehicle                                         | E2 10 <sup>-9</sup> M | E4 10 <sup>-10</sup> M | E4 10 <sup>-7</sup> M |
| 8,80728                                         | 16,55824              | 10,65471               | 22,86085              |
| 10,15728                                        | 20,24766              | 8,820607               | 22,89157              |
| 11,63038                                        | 22,81314              | 8,189587               | 22,2351               |
| 13,11502                                        | 18,28168              |                        |                       |
| 9,208391                                        | 20,68641              |                        |                       |
| 8,27153                                         | 20,65095              |                        |                       |
|                                                 |                       |                        |                       |
| n= 3-6 independent samples                      |                       |                        |                       |
| Each sample was runned two times independently. |                       |                        |                       |
