# Supplementary material for: Estetrol Combined to Progestogen for Menopause or Contraception Indication Is Neutral on Breast Cancer
Source: MDPI journal article supplement (doi:10.3390/cancers13102486), 2021-05-20
Supplement: s1 [file s1]

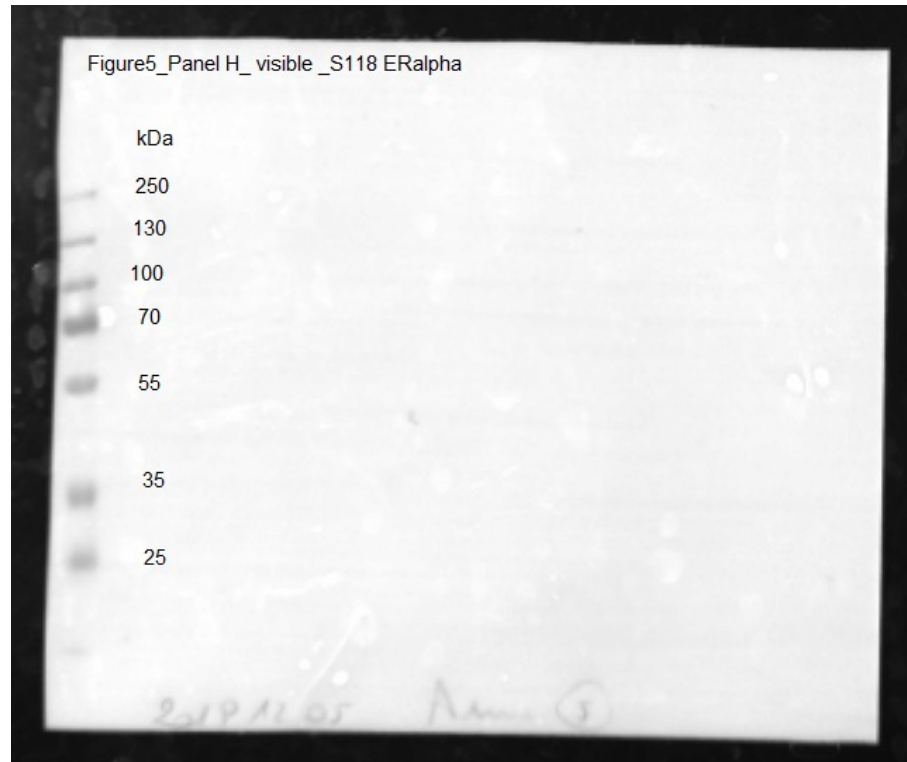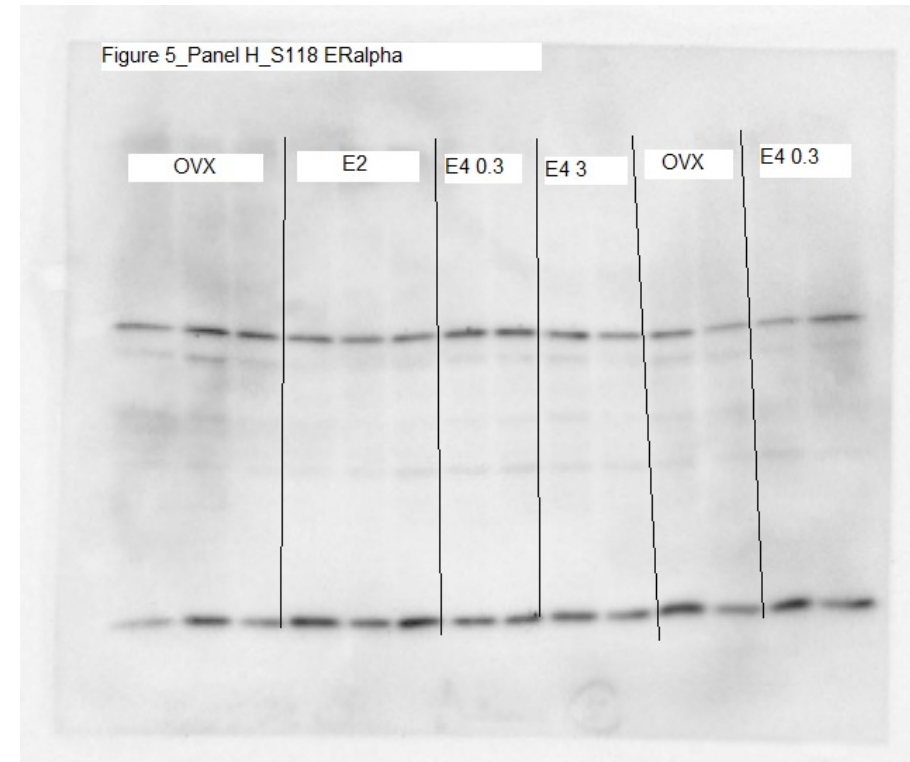

pS118-ERalpha 66kDa

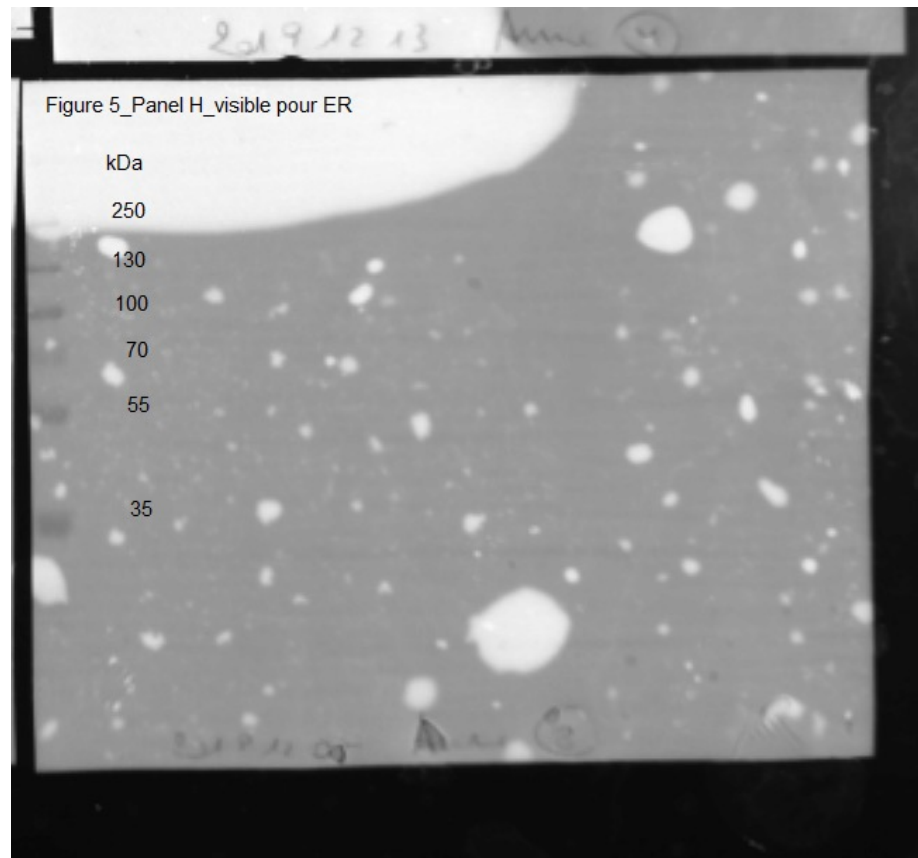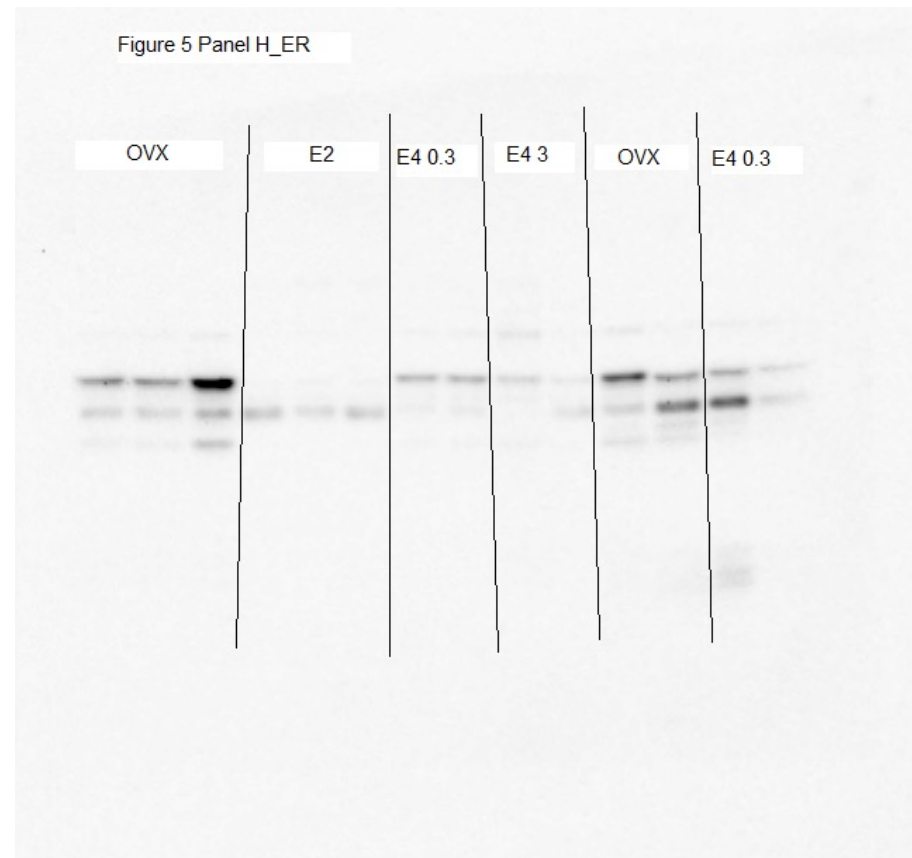

ERalpha 66kDa, 54kDa

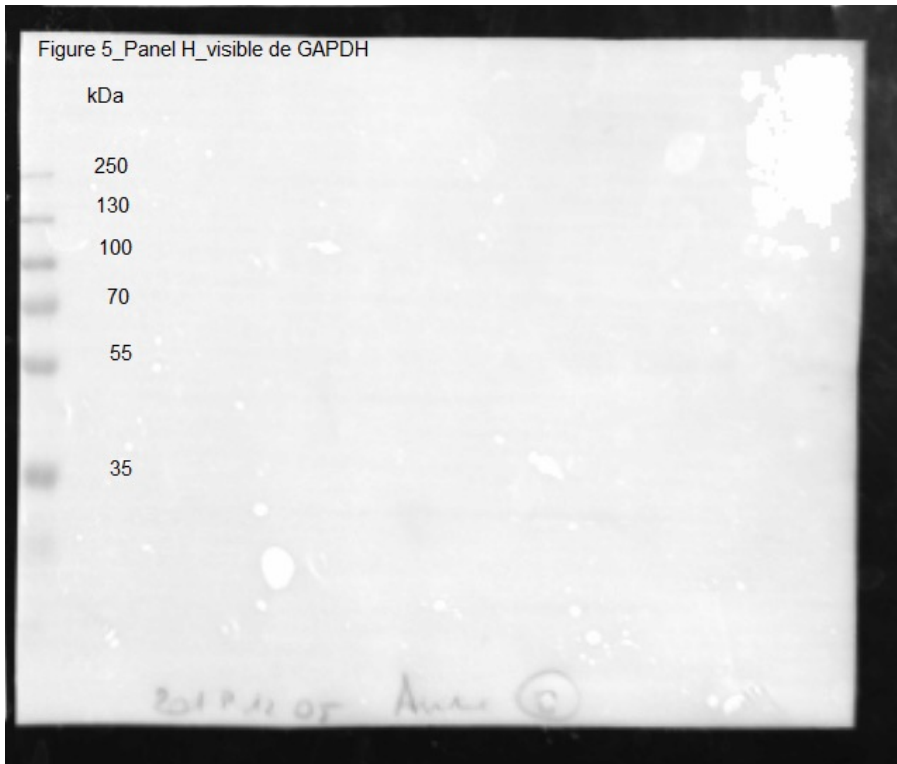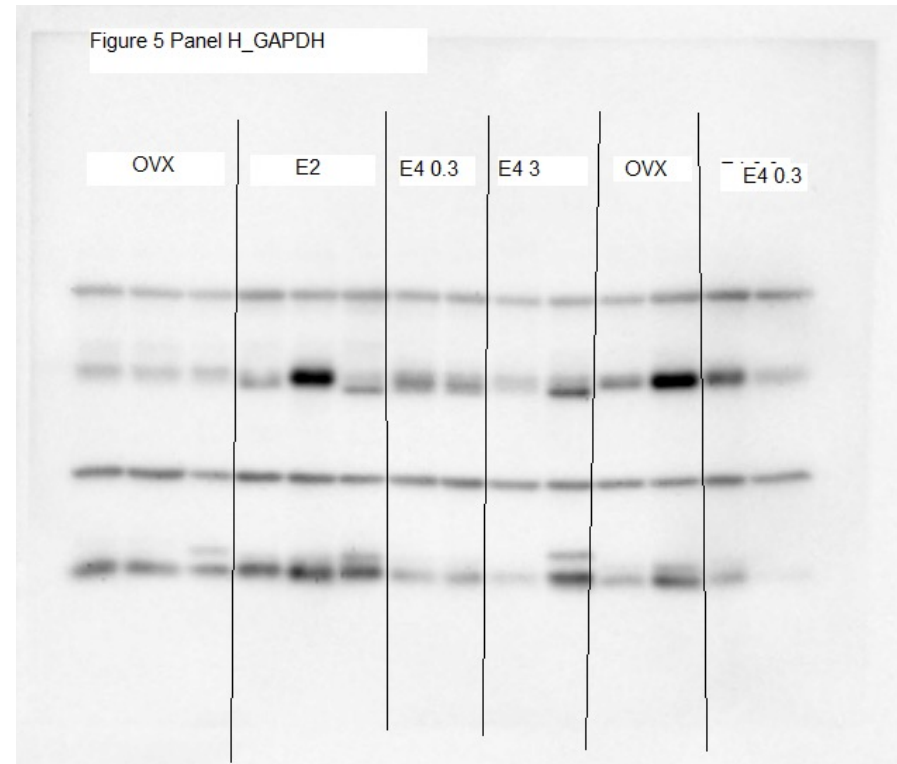

## GAPDH 37kDa

Immunostainings have been made successively on the same membrane, using stripping between two immunostainings.

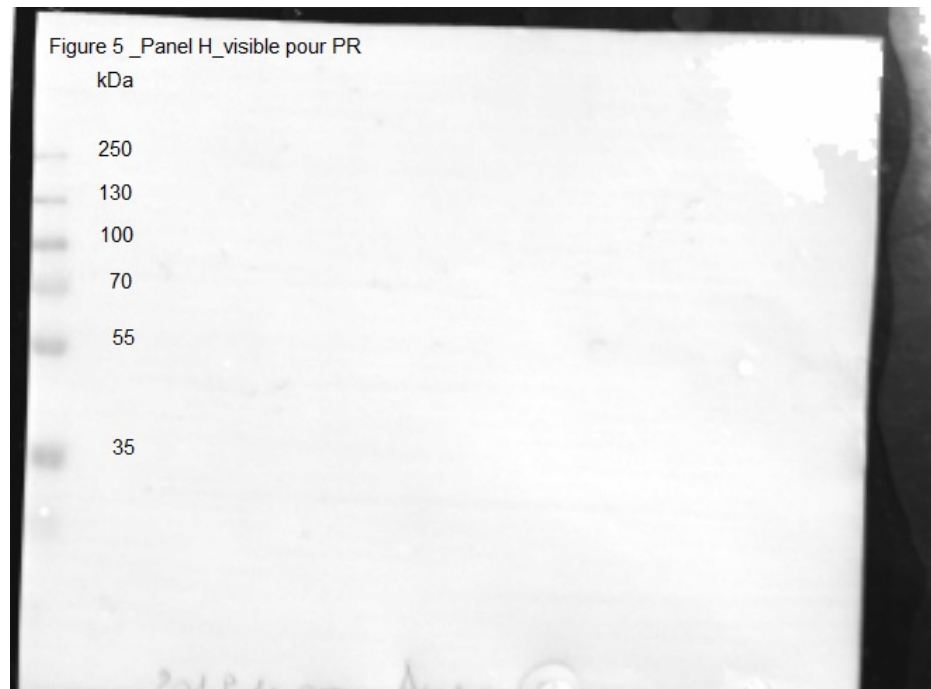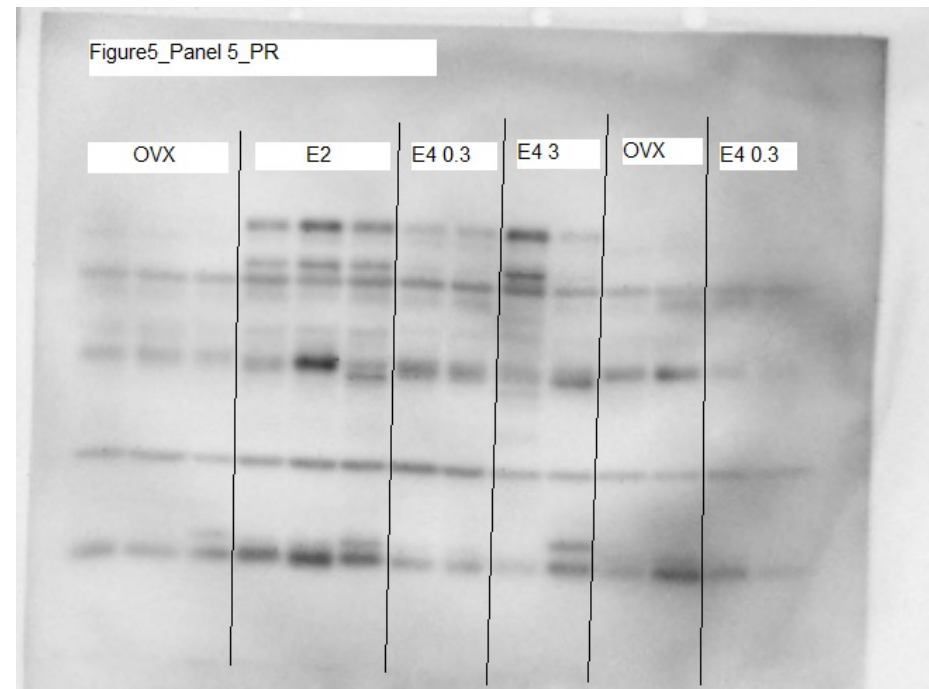

PRB 118kDa

PRA 90kDa

Immunostainings have been made successively on the same membrane, using stripping between two immunostainings.

|                                        |            |               |             |            |               |
|----------------------------------------|------------|---------------|-------------|------------|---------------|
| PDX Tumors Western blot quantification |            |               |             |            |               |
| Figure 5 Panel H                       |            |               |             |            |               |
| PR/GAPDH Quantification                |            |               |             |            |               |
| W10                                    |            |               |             | W35        |               |
| <b>OVX</b>                             | <b>E2</b>  | <b>E4 0.3</b> | <b>E4 3</b> | <b>OVX</b> | <b>E4 0.3</b> |
| 0,47998152                             | 1,65968344 | 1,20369528    | 1,77831338  | 1,57022038 | 0,8746651     |
| 0,82287729                             | 1,93847762 | 0,822899      | 1,70684831  | 0,67819482 | 0,77597595    |
| 0,86120565                             | 1,92993962 | 0,61491538    | 1,22803994  | 0,52409644 | 0,66006152    |
| 0,3442122                              | 1,67405663 | 0,66252814    | 1,57155689  | 0,5861421  | 0,90249824    |
| 0,35764802                             | 0,68263502 |               |             |            |               |
|                                        | 0,82772675 |               |             |            |               |

|                                        |            |               |             |            |               |
|----------------------------------------|------------|---------------|-------------|------------|---------------|
| PDX Tumors Western blot quantification |            |               |             |            |               |
| Figure 5 Panel H                       |            |               |             |            |               |
| S118Eralpha/ERalpha Quantification     |            |               |             |            |               |
| W10                                    |            |               |             | W35        |               |
| <b>OVX</b>                             | <b>E2</b>  | <b>E4 0.3</b> | <b>E4 3</b> | <b>OVX</b> | <b>E4 0.3</b> |
| 0,29740242                             | 0,84790078 | 0,51536285    | 0,40745794  | 0,22944975 | 0,3101747     |
| 0,17212515                             | 1,78500557 | 0,47590245    | 0,70294306  | 0,28487506 | 0,53875908    |
| 0,26585779                             | 1,20311521 | 0,9777073     | 2,52952179  | 0,64354512 | 1,03314909    |
| 0,51945756                             | 1,24800343 | 0,71373993    | 2,58603532  | 0,87584261 | 0,687056827   |
| 0,27575601                             | 2,39352511 |               |             |            |               |
|                                        | 2,09065066 |               |             |            |               |

n= 4-6 independant replicats

All the samples were separated in two gels.

Each sample was run two times independently.
