# Supplementary material for: Estetrol Combined to Progestogen for Menopause or Contraception Indication Is Neutral on Breast Cancer
Source: MDPI journal article supplement (doi:10.3390/cancers13102486), 2021-05-20
Supplement: s1 [file s1]

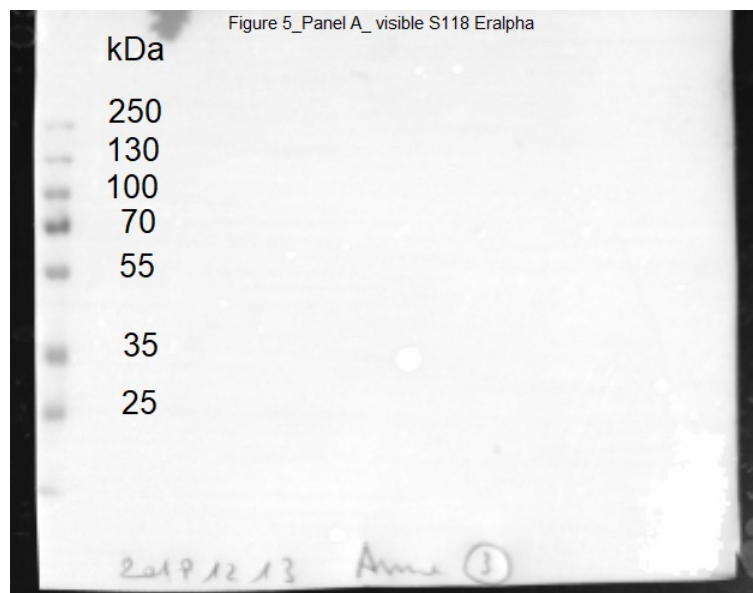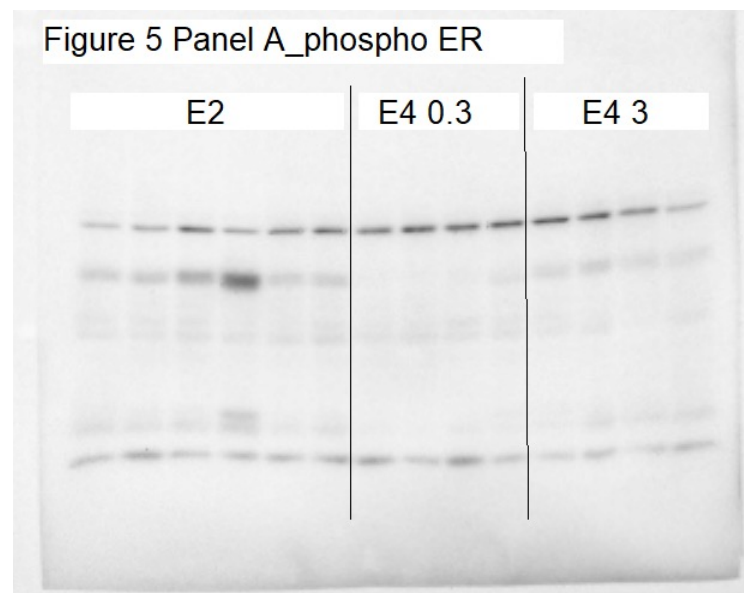

pS118-ERalpha 66kDa

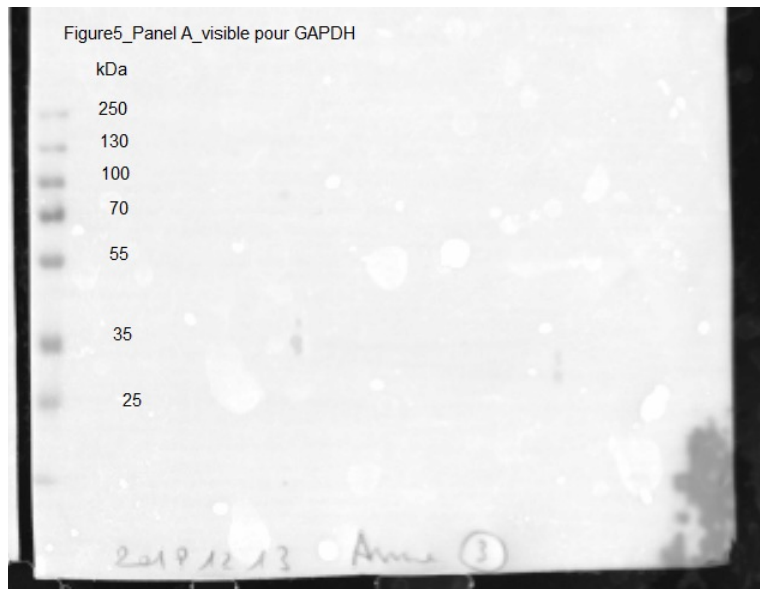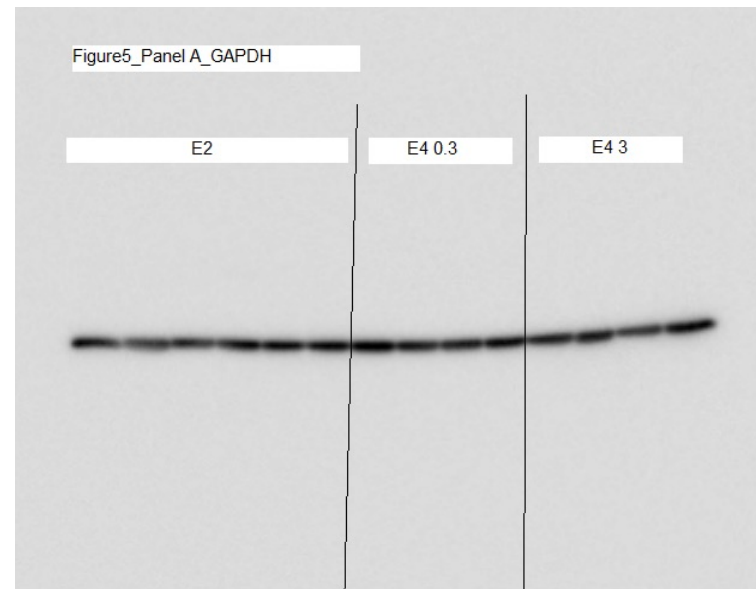

GAPDH 37kDa

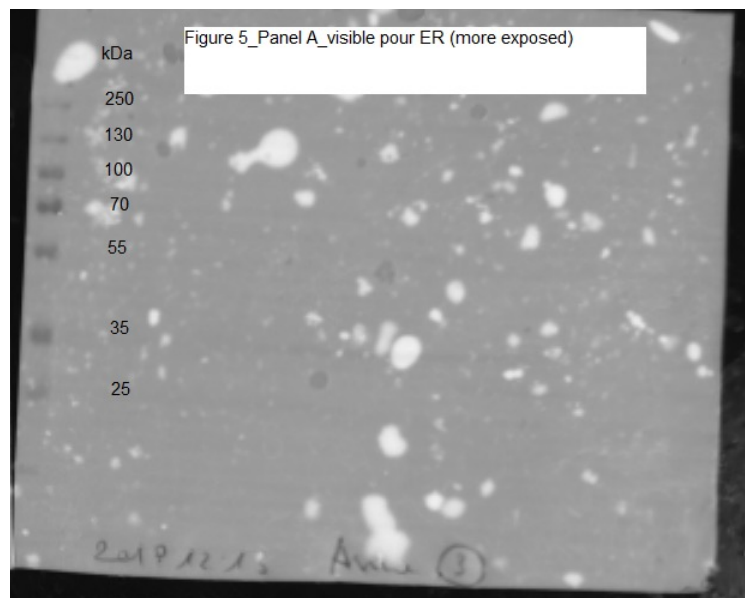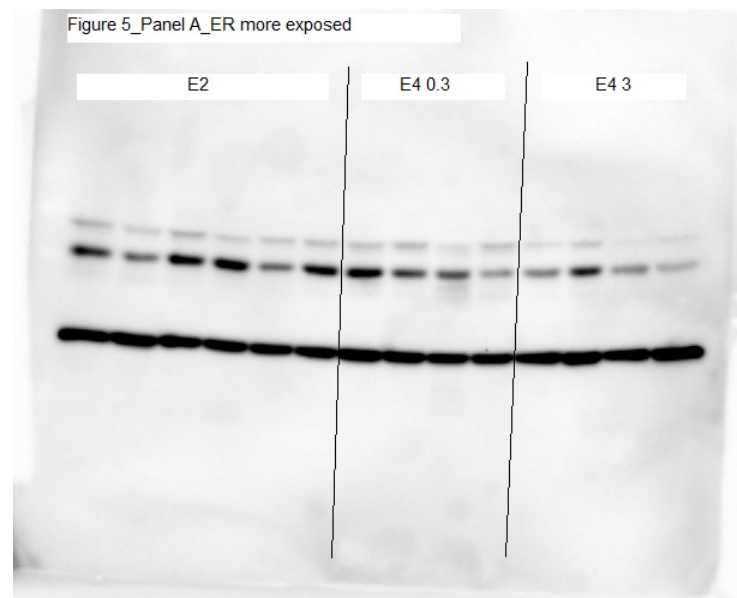

ERalpha 66kDa, 54kDa

Immunostainings have been made successively on the same membrane, using stripping between two immunostainings.

Figure 5\_Panel A\_PR

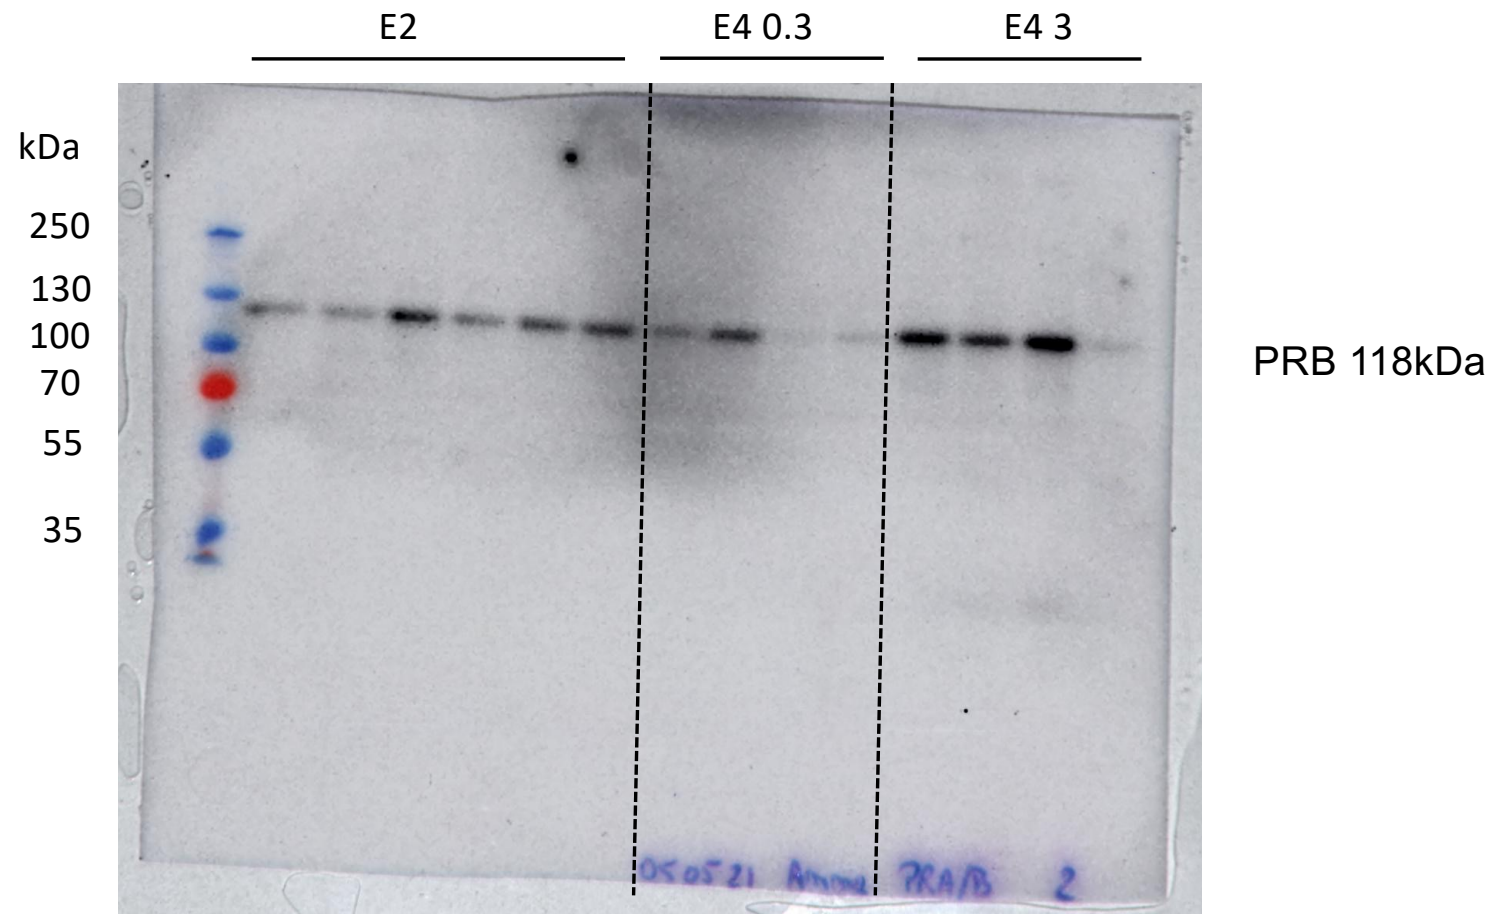

# MCF7 Tumors Western blot quantification

## Figure 5 Panel A

### PR/GAPDH Quantification

| E2         | E4 0.3     | E4 3       |
|------------|------------|------------|
| 7,05149382 | 7,67260386 | 6,51067051 |
| 7,32381518 | 6,08351359 | 6,79303214 |
| 7,4091081  | 6,17318763 | 7,47170443 |
| 6,9707311  | 7,07740892 | 6,90225236 |
| 6,73759318 | 7,8083337  | 8,72834594 |
| 8,6289407  | 4,35667894 | 8,05131712 |
| 8,82229658 | 4,99482605 | 7,68069838 |
| 7,72233509 | 5,77207014 | 6,23389095 |
| 6,95305499 |            |            |

# MCF7 Tumors Western blot quantification

## Figure 5 Panel A

### S118Eralpha/ERalpha Quantification

| E2         | E4 0.3     | E4 3       |
|------------|------------|------------|
| 2,94729097 | 2,67091448 | 1,81431439 |
| 3,33240242 | 3,62002427 | 2,73804205 |
| 1,93943406 | 3,10962931 | 4,11197765 |
| 2,04838593 | 2,06068449 | 2,1270495  |
| 9,00806468 | 3,79974538 | 8,44331019 |
| 8,77690365 | 3,7567859  | 6,74745546 |
| 6,87815235 | 2,010441   | 8,48838761 |
| 4,45484731 | 4,58418287 | 7,04203997 |
| 5,38126526 |            |            |

n= 8-9 independant replicats

All the samples were run in two gels.

Each sample was run two times independently.
